# Supplementary material for: An Antibiotic-Releasing Bone Void Filling (ABVF) Putty for the Treatment of Osteomyelitis
Source: Materials (Basel). 2020 Nov 11;13(22):5080. doi: 10.3390/ma13225080 (PMC7698155; doi:10.3390/ma13225080)
Supplement: Supplementary file 1 [file materials-13-05080-s001.pdf]

# Supplementary Materials: An Antibiotic-Releasing Bone Void Filling (ABVF) Putty for the Treatment of Osteomyelitis

Raquib Hasan <sup>1</sup>, Abbey Wohlers <sup>2</sup>, Jacob Shreffler <sup>1</sup>, Pranothi Mulinti <sup>1</sup>, Hunter Ostlie <sup>3</sup>, Codi Schaper <sup>4</sup>, Benjamin Brooks <sup>5</sup> and Amanda Brooks <sup>1,6\*</sup>

<sup>1</sup> Department of Pharmaceutical Sciences, North Dakota State University, Fargo, ND 58102, USA; [raquib.hasan@ndsu.edu](mailto:raquib.hasan@ndsu.edu) (R.H.); [jacob.shreffler@ndsu.edu](mailto:jacob.shreffler@ndsu.edu) (J.S.); [pranothi.mulinti@ndsu.edu](mailto:pranothi.mulinti@ndsu.edu) (P.M.)

<sup>2</sup> Department of Pharmacy, North Dakota State University, Fargo, ND 58102, USA; [abbey.wohlers@ndsu.edu](mailto:abbey.wohlers@ndsu.edu)

<sup>3</sup> School of Medicine, St. George's University, University Centre Grenada, West Indies, Grenada; [hostlie@sgu.edu](mailto:hostlie@sgu.edu)

<sup>4</sup> College of Veterinary Medicine, Kansas State University, Manhattan, KS 66502, USA; [schaper@vet.k-state.edu](mailto:schaper@vet.k-state.edu)

<sup>5</sup> Department of Biomedical Sciences, Rocky Vista University, Ivins, UT 84734, USA; [bbrooks@rvu.edu](mailto:bbrooks@rvu.edu)

<sup>6</sup> Department of Research and Scholarly Activity, Rocky Vista University, Ivins, UT 84734, USA

\* Correspondence: [abrooks@rvu.edu](mailto:abrooks@rvu.edu)

**S1.1 HPLC validation of vancomycin free-base:** HPLC was carried out using the following method. Briefly, mobile phase contained 0.1% TFA in water and 0.1% TFA in acetonitrile. The flow rate was set at 1 mL/min. Vancomycin salt stock solution and different fractions during the vancomycin free-base preparation (VancFB2) was analyzed to see if there are by-products. The wavelength was 280 nm and Waters Corporation Alliance e2695 with PDA detector HPLC system (Milford, MA, USA) was used with a C18 column (XTERRA RP 18 5mm 4.6 × 250 mm column). HPLC validation of V-fb showed that no additional by product was created during the V-fb production. The peaks appeared at the same spot for V-fb as it did for V-HCl (Figure S1).

## HPLC Validation of V-FB

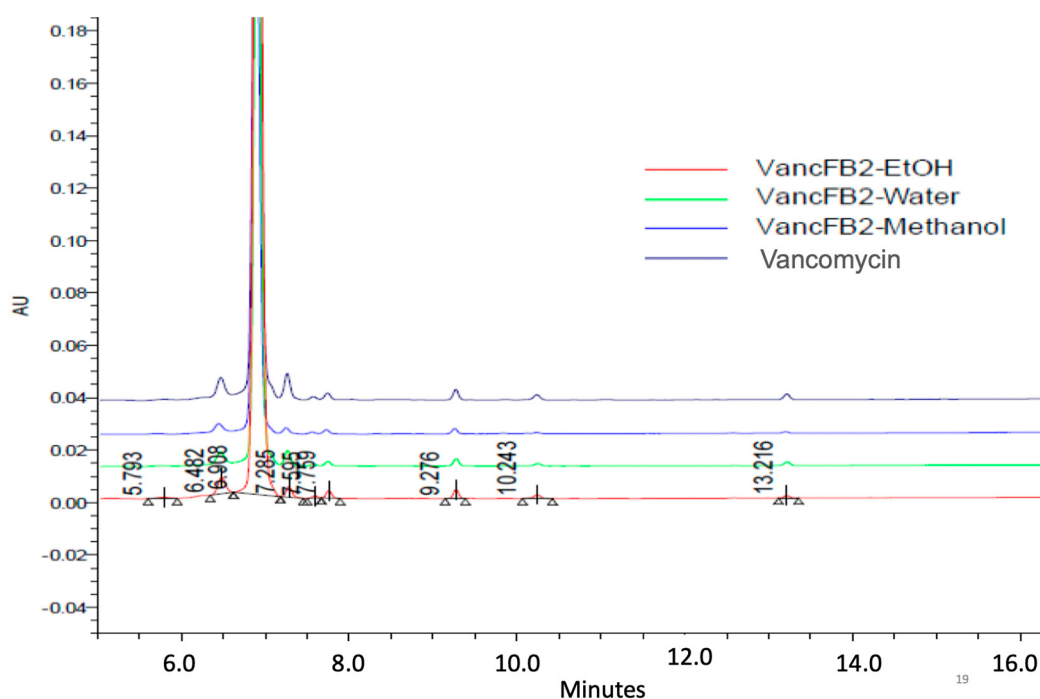

**Figure S1.** HPLC validation of V-fb. The peaks appeared at the same time for both V-HCl and V-fb confirming the production of V-fb.

S1.2 In vitro bioactivity of V-fb: To compare the in vitro bioactivity of prepared V-fb and V-HCl, a Kirby-bauer ZOI (zone of inhibition) assay was done using different concentrations of the drugs against *Staphylococcus aureus* (ATCC 49230) as described in the manuscript. Bioactivity of V-fb and V-HCl against *S. aureus* measured via ZOI assay was similar. No significant difference was seen between the ZOI with no bacterial growth at a particular concentration ( $n = 3$  for each concentration) (Figure S2).

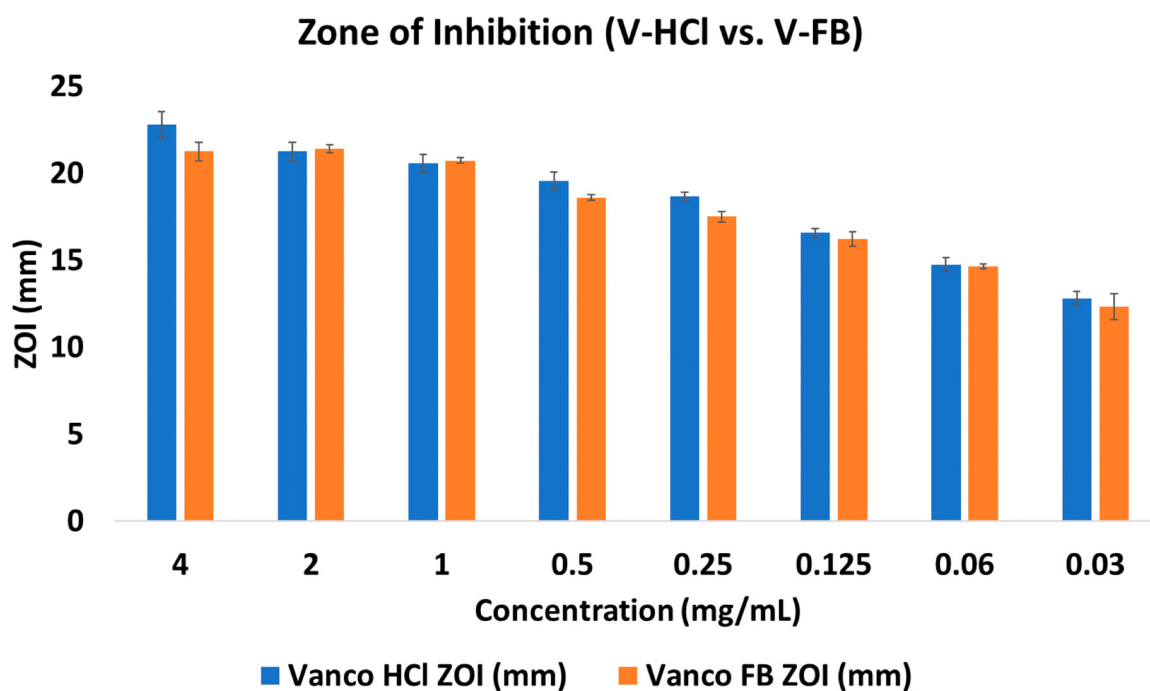

**Figure S2.** The bioactivity of V-HCl and V-FB was determined via a Kirby Bauer zone of inhibition study (*Staphylococcus aureus* strain 49230:  $1.0 \times 10^7$  CFU/mL).

S1.3 Making of Bone Crusher: From a local hardware store three components (Figure S3): the bottom part (A) screws on to the barrel (B). The piston (C) then can be used to pulverize the bone using a hammer. (D) is the finished crusher. The crusher was autoclaved before being used for pulverizing the snap-frozen bone.

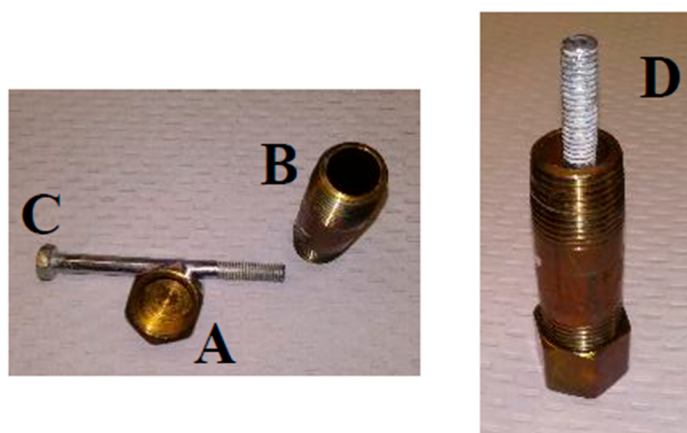

**Figure S3.** The bone crusher was made using three components. The bottom part (A) screws on to the barrel (B). The piston (C) then can be used to pulverize the bone using a hammer. (D) is the finished crusher.

**Table S1.** Vancomycin release kinetics from ABVF fitted into different kinetics equation. Korsmeyer-Peppas equation seems to have the best fitted model with high R<sup>2</sup> value.

| <b>Drug Release<br/>Kinetic<br/>Equation</b> | <b>Zero-<br/>Order</b> | <b>First-<br/>Order</b> | <b>Korsmeyer-<br/>Peppas</b> | <b>Higuchi</b> | <b>Hixon-<br/>Crowell</b> |
|----------------------------------------------|------------------------|-------------------------|------------------------------|----------------|---------------------------|
| R <sup>2</sup>                               | 0.7181                 | 0.9478                  | 0.9964                       | 0.8939         | 0.907                     |
